# Supplementary material
Source: PubMed Central journal article supplement (PMC10885008)
Supplement: NIHMS1965429-supplement-Supplemental_Tables.pdf [file NIHMS1965429-supplement-Supplemental_Tables.pdf]

**Supplemental Table 1. Data availability across included ECHO cohorts.**

| <b>Cohort</b>                                                      | <b>NICU-HEALTH<br/>(N = 380)</b> | <b>ECHO-NOVI<br/>(N = 567)</b> | <b>ELGAN<br/>(N = 1089)</b> |
|--------------------------------------------------------------------|----------------------------------|--------------------------------|-----------------------------|
| <b><i>Sample Size (%) with Outcome Variable</i></b>                |                                  |                                |                             |
| Bayley                                                             | 298 (78%)                        | 438 (77%)                      | 965 (89%)                   |
| CBCL                                                               | 142 (37%)                        | 550 (97%)                      | 698 (64%)                   |
| CP                                                                 | 86 (23%)                         | 439 (77%)                      | 952 (87%)                   |
| MCHAT                                                              | 196 (51%)                        | 563 (99%)                      | 1051 (97%)                  |
| <b><i>Sample Size (%) with Each Number of Outcome Variable</i></b> |                                  |                                |                             |
| 1                                                                  | 180 (47%)                        | 10 (2%)                        | 46 (4%)                     |
| 2                                                                  | 59 (16%)                         | 109 (19%)                      | 94 (9%)                     |
| 3                                                                  | 141 (37%)                        | 30 (5%)                        | 364 (33%)                   |
| 4                                                                  | 0 (0%)                           | 418 (74%)                      | 585 (54%)                   |

CBCL, Child Behavior Checklist for Ages 1½-5; CP, cerebral palsy; M-CHAT, Modified Checklist for Autism in Toddlers.

**Supplemental Table 2. Characteristics of study sample by ECHO cohort**

| Variable                                | NICU-HEALTH        | ECHO-NOVI          | ELGAN              |
|-----------------------------------------|--------------------|--------------------|--------------------|
|                                         | ( <i>N</i> = 380)  | ( <i>N</i> = 567)  | ( <i>N</i> = 1089) |
|                                         | <i>M (SD) or %</i> | <i>M (SD) or %</i> | <i>M (SD) or %</i> |
| <i>Neonatal characteristics</i>         |                    |                    |                    |
| Gestational age at birth (weeks)        | 26.6 (2.4)         | 26.6 (1.9)         | 25.6 (1.2)         |
| Birth weight (grams)                    | 952 (427)          | 943 (280)          | 835 (193)          |
| Small for gestational age               | 21%                | 16%                | 13%                |
| Male sex                                | 49%                | 54%                | 52%                |
| Female sex                              | 51%                | 46%                | 48%                |
| Infant admitted to NICU                 | 100%               | 100%               | 100%               |
| Infant race                             |                    |                    |                    |
| American Indian/Alaskan Native          | <1%                | <1%                | <1%                |
| Asian                                   | 2.9%               | 5.1%               | 2.4%               |
| Black                                   | 23%                | 20%                | 27%                |
| Multiple Races                          | 4.2%               | 19%                | <1%                |
| Native Hawaiian/Pacific Islander        | <1%                | <1%                | <1%                |
| Other Race                              | <1%                | 7.6%               | 7.0%               |
| Race Unknown                            | <2%                | <1%                | 2.3%               |
| White                                   | 68%                | 48%                | 60%                |
| Infant ethnicity                        |                    |                    |                    |
| Hispanic/Latino/a                       | 10%                | 23%                | 12%                |
| Not Hispanic/Latino/a                   | 90%                | 77%                | 88%                |
|                                         | NICU-HEALTH        | ECHO-NOVI          | ELGAN              |
|                                         | ( <i>N</i> = 334)  | ( <i>N</i> = 498)  | ( <i>N</i> = 929)  |
|                                         | <i>M (SD) or %</i> | <i>M (SD) or %</i> | <i>M (SD) or %</i> |
| <i>Maternal demographics</i>            |                    |                    |                    |
| Age at birth (years)                    | 30.5 (6.1)         | 29.1 (6.4)         | 28.6 (6.7)         |
| 4-year college degree                   | 34%                | 24%                | 31%                |
| Married/partnered                       | 56%                | 77%                | 77%                |
| <i>Maternal medical problems</i>        |                    |                    |                    |
| Gestational diabetes                    | 12%                | 8.8%               | 6.6%               |
| Pre-eclampsia                           | 20%                | 25%                | 18%                |
| <i>Perinatal maternal substance use</i> |                    |                    |                    |
| Tobacco                                 | 5.7%               | 16%                | 14%                |
| Alcohol                                 | 2.6%               | 4.0%               | --                 |
| Opioid                                  | 25%                | 14%                | --                 |
| Marijuana                               | 3.5%               | 9.3%               | --                 |
| Illicit drugs                           | 3.1%               | 4.6%               | --                 |

NICU, neonatal intensive care unit.

No data were available from ELGAN for prenatal alcohol, opioid, marijuana, or illicit drug use.
